# Supplementary material for: Scientific evidence underlying contraindications to the ketogenic diet: An update
Source: PubMed Central journal article supplement — Obes Rev. 2020 Jul 10;21(10):e13053. doi: 10.1111/obr.13053 (PMC7539910; doi:10.1111/obr.13053), 2020-07-10
Supplement: OBR-21-e13053-s001.pdf [file OBR-21-e13053-s001.pdf]

**Supplementary material to:**

**Scientific evidence underlying contraindications to the ketogenic diet: an update**

**Mikiko Watanabe<sup>1\*</sup>, Dario Tuccinardi<sup>2</sup>, Ilaria Ernesti<sup>1,3</sup>, Sabrina Basciani<sup>1</sup>, Stefania Mariani<sup>1</sup>, Alfredo Genco<sup>3</sup>, Silvia Manfrini<sup>2</sup>, Carla Lubrano<sup>1</sup>, and  
Lucio Gnessi<sup>1</sup>**

<sup>1</sup> Department of Experimental Medicine, Section of Medical Pathophysiology, Food Science and Endocrinology, Sapienza University of Rome, Rome, Italy

<sup>2</sup> Department of Endocrinology and Diabetes, University Campus Bio-Medico of Rome, Rome, Italy

<sup>3</sup> Department of Surgical Sciences, Surgical Endoscopy Unit, Sapienza University of Rome, Rome, Italy

**Please address correspondence to:** Mikiko Watanabe MD PhD, Department of Experimental Medicine, Section of Medical Pathophysiology, Food Science and Endocrinology, Sapienza University of Rome, Rome, Italy. Email: [mikiko.watanabe@uniroma1.it](mailto:mikiko.watanabe@uniroma1.it)

| Dietary intervention   |                                 | Contraindication     |                         |                          |                           |                                            |                           |                                |       |               |
|------------------------|---------------------------------|----------------------|-------------------------|--------------------------|---------------------------|--------------------------------------------|---------------------------|--------------------------------|-------|---------------|
| Intervention           | Keywords                        | Topic                | Keywords                | Topic                    | Keywords                  | Topic                                      | Keywords                  |                                |       |               |
| <i>Diet full names</i> | Ketogenic diet                  | <i>General</i>       | safety                  | <i>SGLT-2 treatment</i>  | SGLT-2 inhibitor          | <i>Cardio- and cerebrovascular disease</i> | stroke                    |                                |       |               |
|                        | High fat low carbohydrate       |                      | contraindications       |                          | <i>Type 1 Diabetes</i>    |                                            | type 1 diabetes           | infarction                     |       |               |
|                        | Very low calorie diet           |                      | adverse events          |                          | <i>Perioperative time</i> |                                            | perioperative             | ischemia                       |       |               |
|                        | Very low calorie ketogenic diet | <i>Liver</i>         | liver failure           | <i>Arrhythmia</i>        | cardiac arrhythmia        | <i>Respiratory failure</i>                 | respiratory failure       |                                |       |               |
|                        | Very low energy diet            |                      | cirrhosis               |                          | torsade de pointe         |                                            | respiratory insufficiency |                                |       |               |
|                        | Very low carbohydrate diet      | <i>Kidney</i>        | end stage liver disease | <i>Frail populations</i> | EKG                       | <i>Cancer</i>                              | COPD                      |                                |       |               |
|                        | Low carbohydrate diet           |                      | chronic kidney disease  |                          | ECG                       |                                            | malignancy                |                                |       |               |
|                        | Protein-sparing modified fast   |                      | kidney failure          |                          | elderly                   |                                            | cancer                    |                                |       |               |
|                        | <i>Diet acronyms</i>            |                      | KD                      |                          | <i>Heart failure</i>      |                                            | renal failure             | <i>Metabolic complications</i> | aging | dyslipidemia  |
|                        |                                 |                      | HFLC                    |                          |                           |                                            | heart failure             |                                | frail | hyperuricemia |
| VLCD                   |                                 |                      | <i>Infection</i>        |                          | cardiac failure           |                                            | substance abuse           |                                |       |               |
| VLCKD                  |                                 |                      |                         |                          | infection                 |                                            | alcohol abuse             |                                |       |               |
| VLED                   |                                 | wound                |                         | eating disorder          |                           |                                            |                           |                                |       |               |
| LCD                    |                                 | <i>Pregnancy</i>     | pregnancy               | mental disorder          |                           |                                            |                           |                                |       |               |
| PSMF                   |                                 | <i>Breastfeeding</i> | breastfeeding           |                          |                           |                                            |                           |                                |       |               |
|                        |                                 |                      | lactation               |                          |                           |                                            |                           |                                |       |               |

**Supplementary Table 1. Research keywords for each investigated contraindication to the KD.**
